# Supplementary material for: Differential Impact of Hexuronate Regulators ExuR and UxuR on the <em>Escherichia coli</em> Proteome
Source: Preprints.org preprint supplement (doi:10.20944/preprints202206.0385.v1), 2022-06-28
Supplement: Supplementary file 1 [file supplementary]

## Sheet: wt glucose-wt glucuronate
№	UniProt	Protein	Score	Function
1	P78285	RrrD	28	DLP12 prophage; lysozyme, endolysin
2	P0DPP1	YnfP	30	small protein, low levels of expression were detected at stationary phase
3	P02925	RbsB	38	Ribose ABC transporter periplasmic binding protein
4	P21362	YciF	34	DUF892 domain-containing protein, induced under osmotic stress
5	P21362	YciF	30	DUF892 domain-containing protein, induced under osmotic stress
6	P37665	YiaD	25	PF13488 (OmpF porin) family lipoprotein
7	P0A832	SmpB	31	SsrA-binding protein
8	P08178	PurM	35	phosphoribosylformylglycinamide cyclo-ligase
9	P0AF28	NarL	30	DNA-binding transcriptional dual regulator
10	P0AB61	YciN	43	uncharacterized protein
11	P0AD07	YecF	42	DUF2594 domain-containing protein, regulated by Nac (related to nitrate metabolism)
12	P36566	CmoM	33	tRNA cmo5U34 methyltransferase
13	P33226	TorC	23	cytochrome c menaquinol dehydrogenase

## Sheet: wt-duxuR glucose
Experiment	№	UniProt	Protein	Score	Function	RNA-seq
I	1	P04949	FliC	247	flagellar filament structural protein	+
	2	P24215	UxuA	75	D-Mannonate dehydratase	+
	3	P68066	GrcA	51	stress-induced alternate pyruvate formate-lyase subunit	-
	4	P33018	YeiG	49	S-formylglutathione hydrolase	-
	5	P0AF63	NsrR	40	HTH-type transcriptional repressor	+
	6	P52647	YdbK	33	pyruvate-flavodoxin oxidoreductase	+
	7	P0ABF4	EutM	27	putative ethanolamine catabolic microcompartment shell protein	n/d	non-detectable mRNA level
II	1	P11664	YggC	6	P-loop NTPase domain-containing protein	+
	2	P0DPO2	YmjE	9	Uncharacterized protein	n/d	non-detectable mRNA level
	3	P37309	ArsR	13	DNA-binding transcriptional repressor	+
	4	P64622	YhdV	7	lipoprotein YhdV	+
	5	C1P619	IlvG	12	acetolactate synthase II subunit	+

## Sheet: wt-duxuR glucuronate
Experiment	№	UniProt	Protein	Score	Function	RNA-seq
I	1	P17315	CirA	202	Colicin I receptor	+
	2	P0AEE5	MglB	140	D-galactose-binding periplasmic protein	+
	3	P0AC33	FumA	82	Fumarate hydratase class I, aerobic	+
	4	P0AEU0	HisJ	73	Histidine-binding periplasmic protein	+
	5	P0AF93	RidA	70	2-iminobutanoate/2-iminopropanoate deaminase	-
	6	P68066	GrcA	39	stress-induced alternate pyruvate formate-lyase subunit	-
II	1	P76516	YfdT	11	Uncharacterized protein, CPS-53 (KpLE1) prophage	+	low mRNA level, non-significant
	2	P39390	YjiS	16	DUF1127 domain-containing protein	n/d	non-detectable mRNA level
	3	P02931	OmpF	48	Outer membrane porin F	+
	4	P33236	MokC	6	Regulatory protein MokC	n/d	non-detectable mRNA level
	5	P16688	PhnJ	11	Alpha-D-ribose 1-methylphosphonate 5-phosphate C-P lyase	n/d	non-detectable mRNA level
	6	P0DTV7	SpeFL	7	Leader peptide	+
	7	P0ADC8	YjiX	6	PF04328 family protein	+	non-significant
	8	P76521	YfdY	6	DUF2545 domain-containing protein	n/d	non-detectable mRNA level
	9	P0AAU2	YbfA	19	DUF2517 domain-containing protein	+
	10	P64622	YhdV	7	lipoprotein YhdV	+
